# Supplementary material
Source: PubMed Central journal article supplement (PMC5679258)
Supplement: NIHMS902354-supplement.pdf [file NIHMS902354-supplement.pdf]

Figure S1

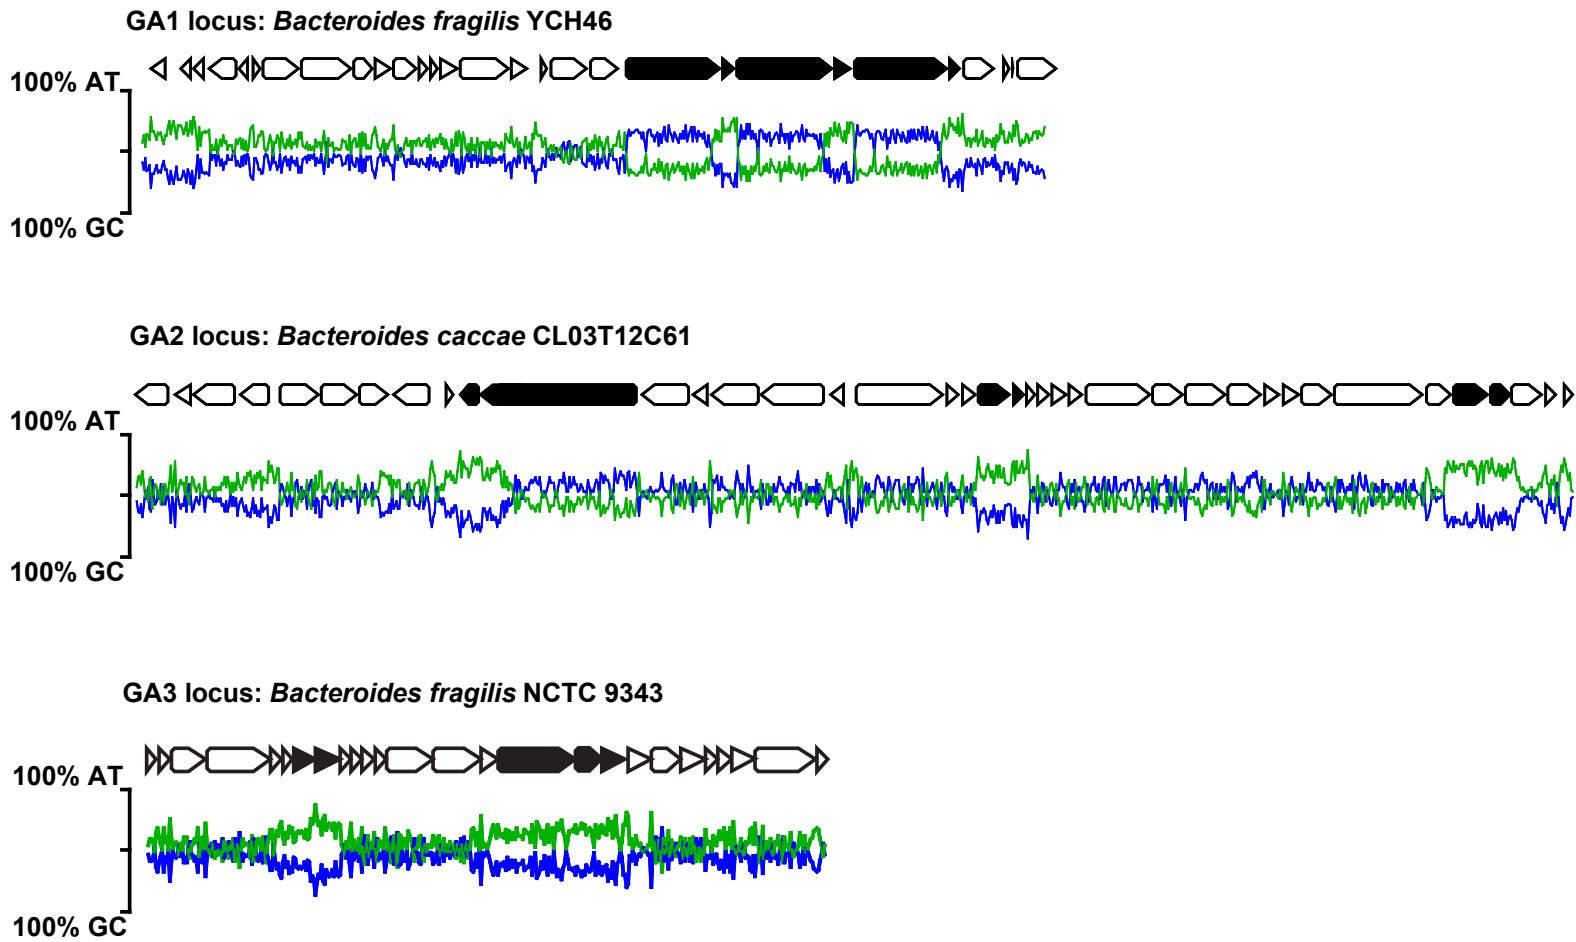

**Figure S1. Genetic organization of the GA1-3 loci in Bacteroidales. Related to Figure 1.**

Schematic of the GA1, GA2, and GA3 loci. E-I genes are filled in with black, while structural genes are outlined. GC and AT content is plotted below the gene diagrams for each locus.

Figure S2

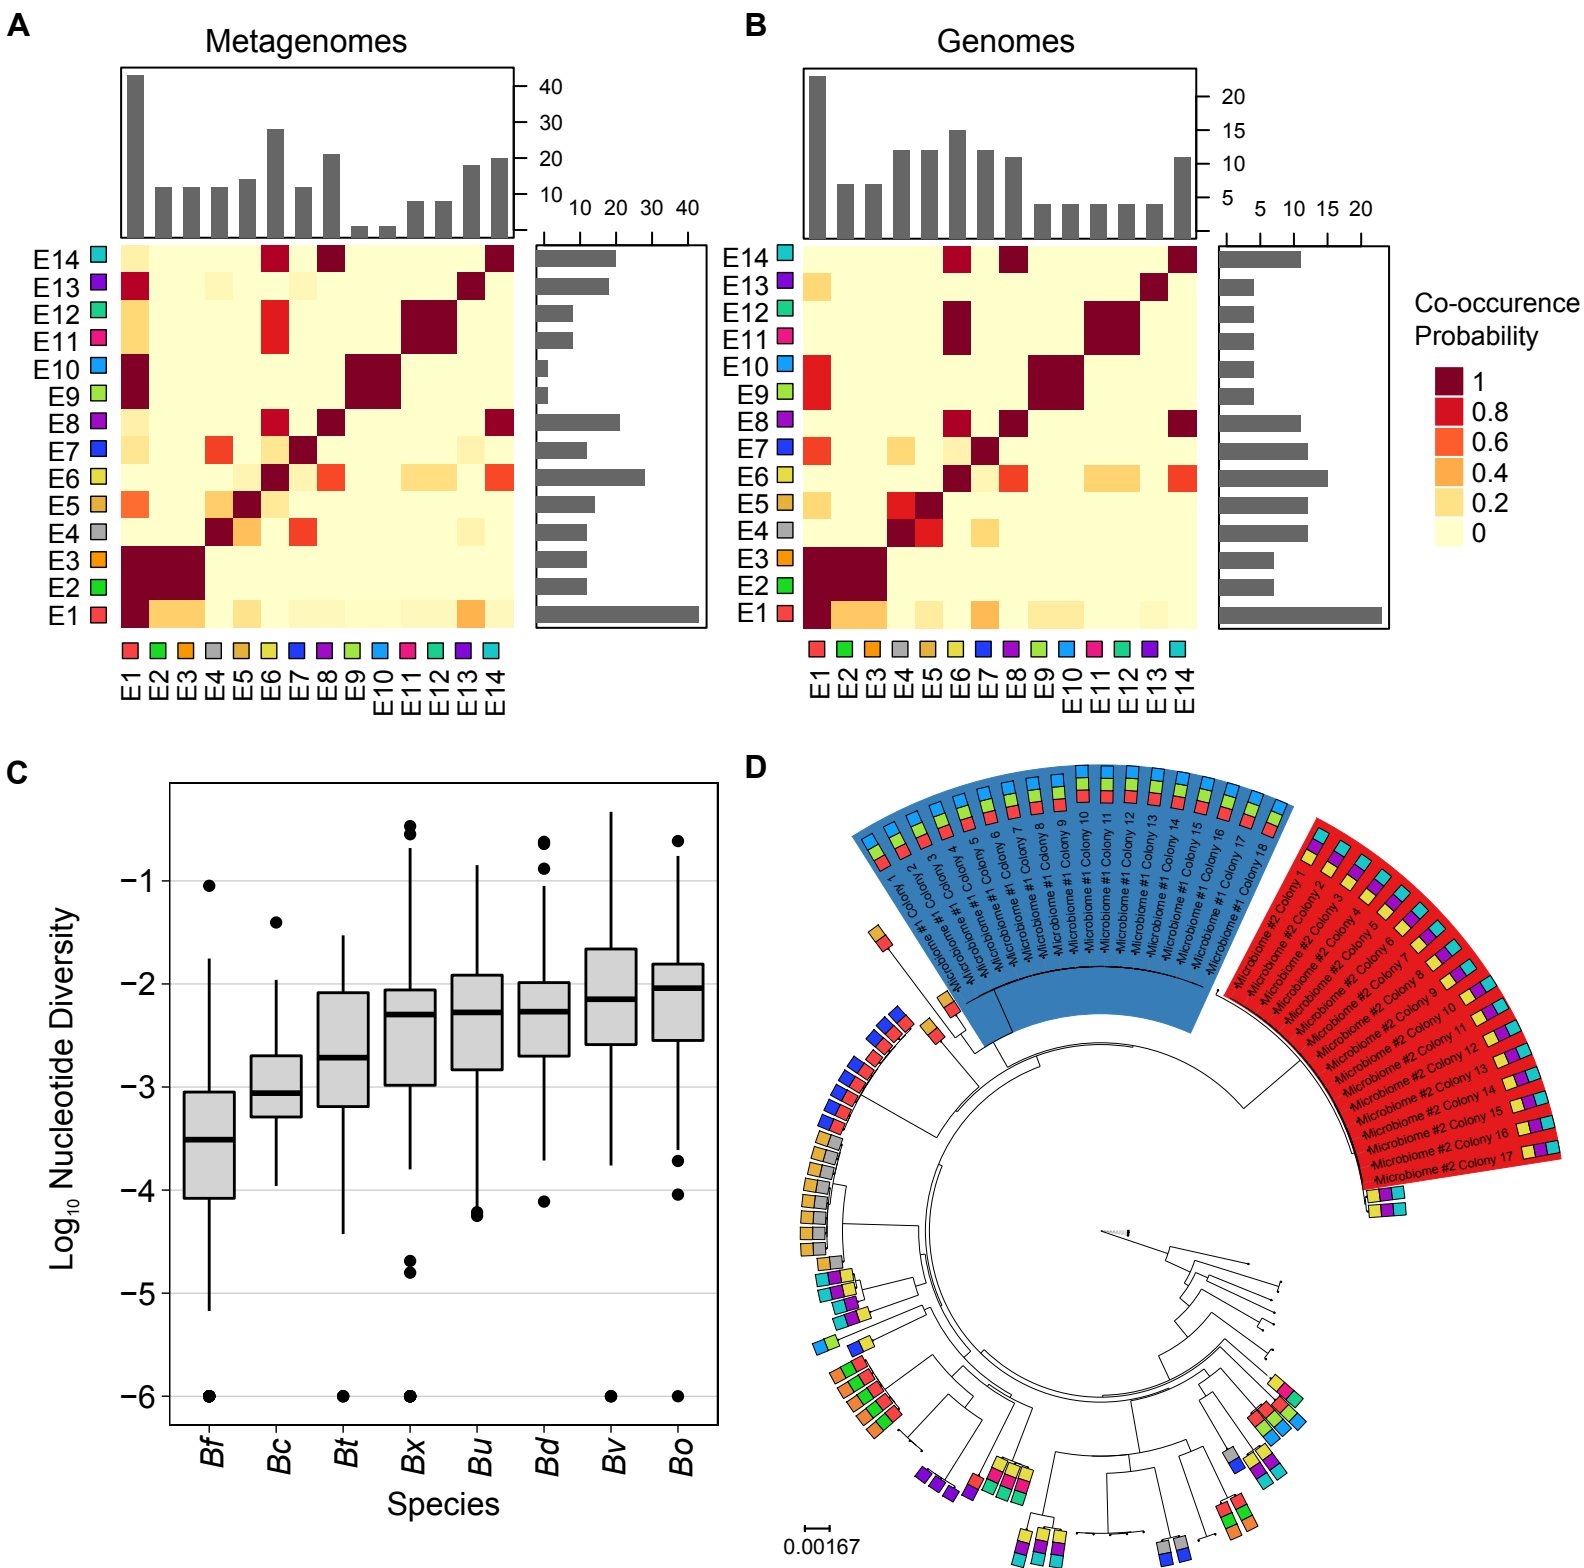

**Figure S2. The co-occurrence of GA3 effector genes, and *Bacteroides* nucleotide and strain diversity in the gut microbiome of adults. Related to Figure 2.**

(A-B) Each cell in the heatmap,  $a_{ij}$ , denotes the probability that effector gene  $i$  is detected in a metagenomic sample (A) or encoded in a genome (B) given that effector gene  $j$  was detected/encoded. The barplots on the top and right of each heatmap illustrate the number of metagenomes or genomes in which each effector gene was detected. (C) The nucleotide diversity for different *Bacteroides* spp. in adult samples from the HMP and MetaHIT studies. Nucleotide diversity was calculated based on population variants in species-specific marker genes (Experimental Procedures). Only species with at least 5 genomes in RefSeq were considered. *Bf*: *B. fragilis*; *Bc*: *B. cellulosilyticus*; *Bt*: *B. thetaiotaomicron*; *Bx*: *B. xylanisolvens*; *Bu*: *B. uniformis*; *Bd*: *B. dorei*; *Bv*: *B. vulgatus*; *Bo*: *B. ovatus*. (D) A phylogenetic tree linking previously sequenced *B. fragilis* reference genomes with sequenced colonies from two individuals (in red and blue). The effector genes encoded by each reference genome and the new sequenced genomes from stool are represented by colored squares as in Figure 1A.

Figure S3

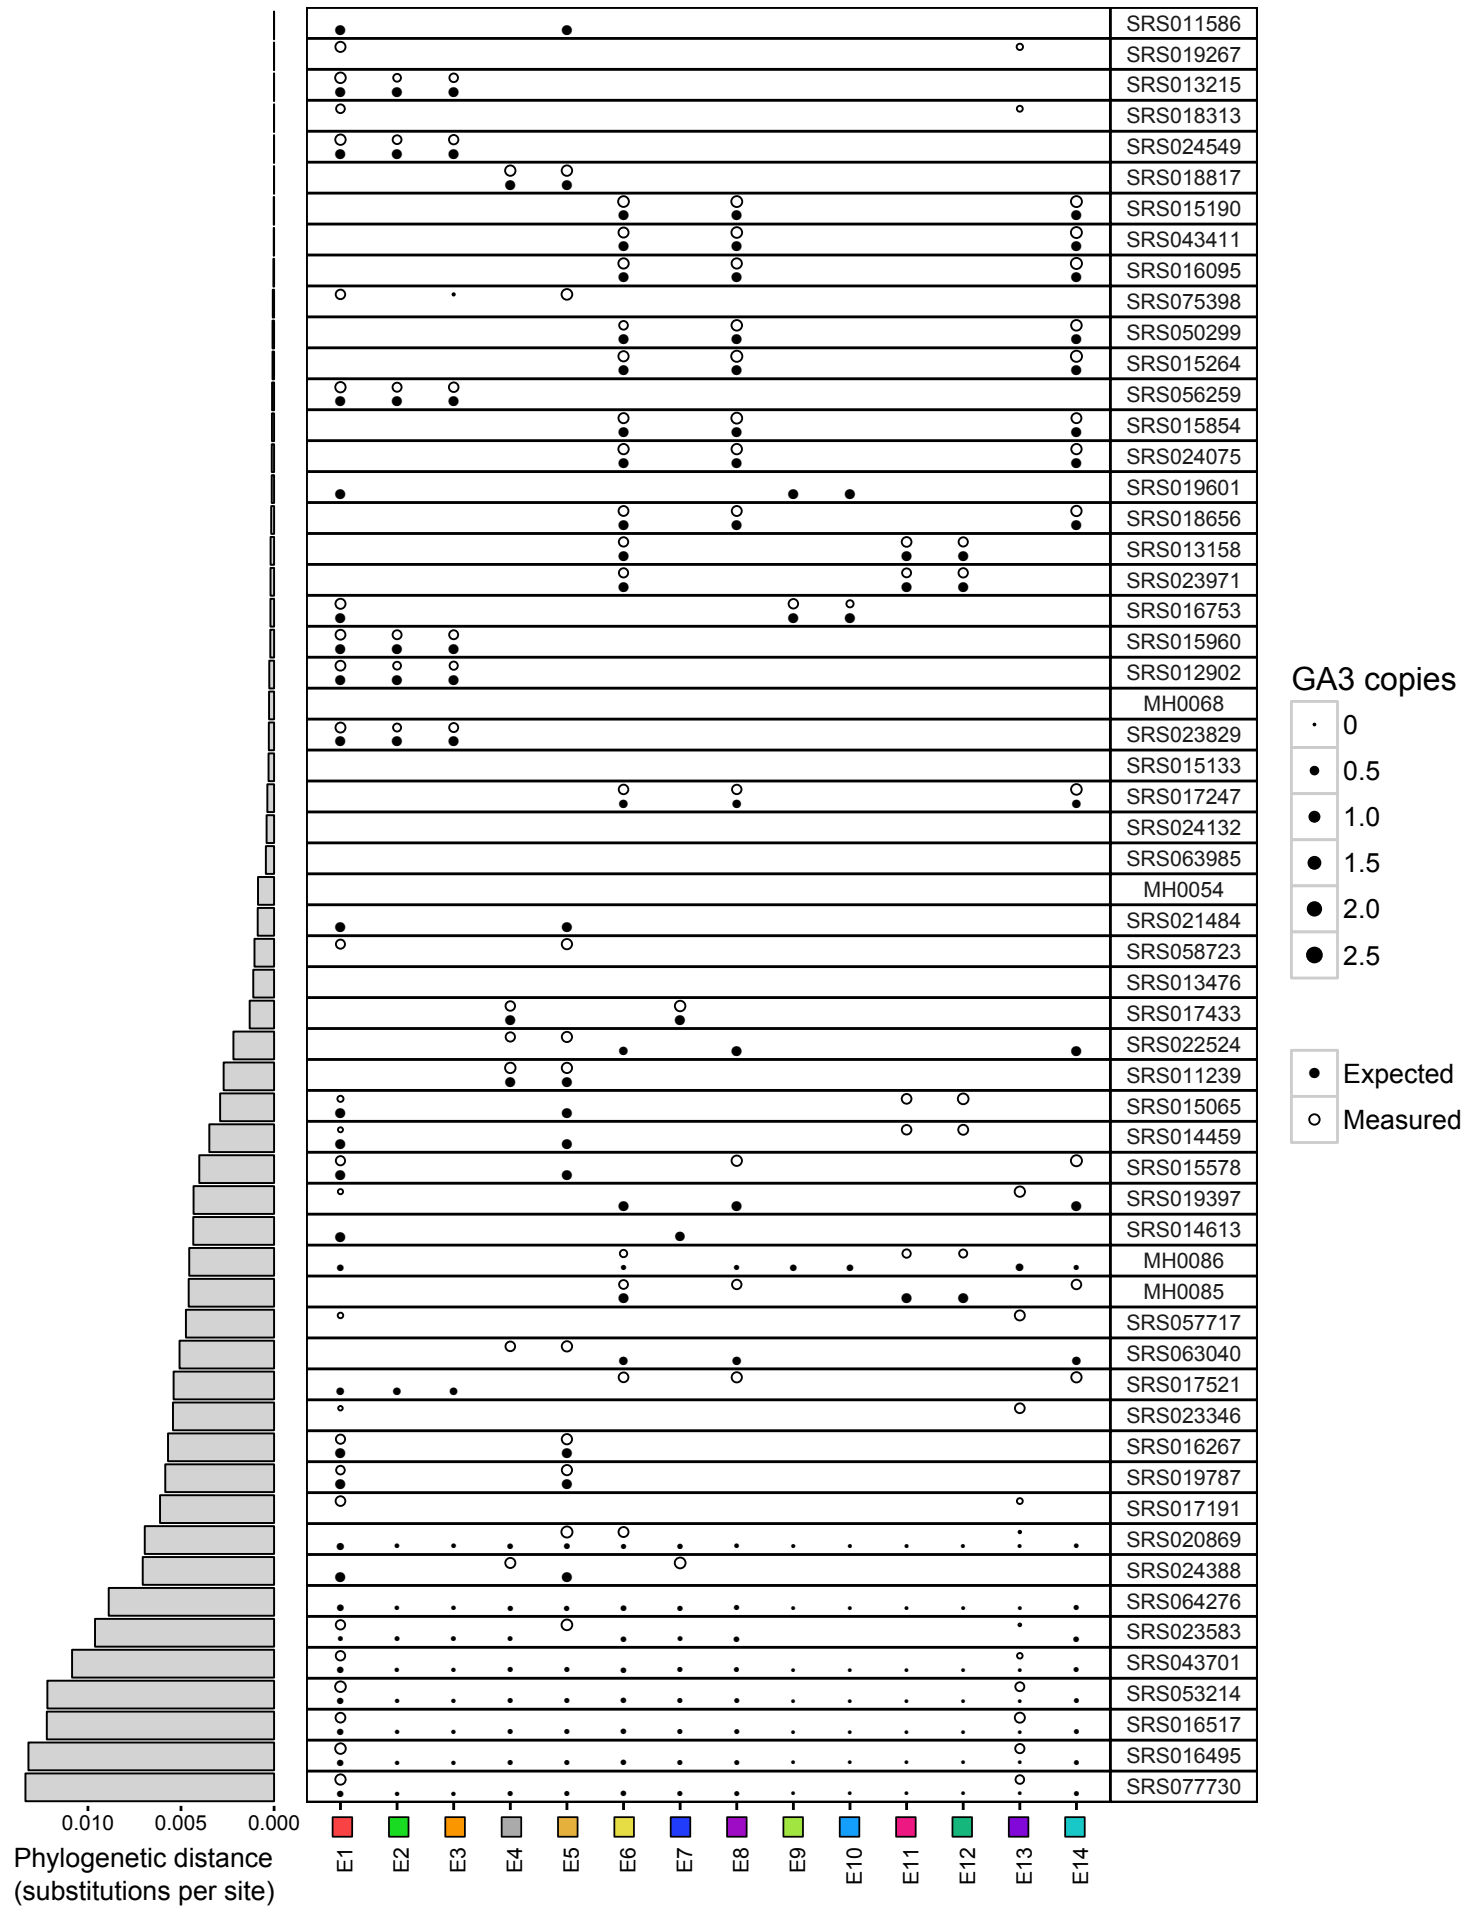

**Figure S3. Measured and expected E–I gene abundances in HMP and MetaHIT samples. Related to Figure 2.** Measured abundances (hollow circles) are based on short read mapping to effector genes. Expected abundances (filled circles) are based on the reference strains phylogenetically closest to the inferred strain. Point size is scaled to the calculated copy number of each effector. The barplot on the left shows the phylogenetic distance between the inferred strain and its nearest reference strain in the phylogenetic tree.

Figure S4

**A**

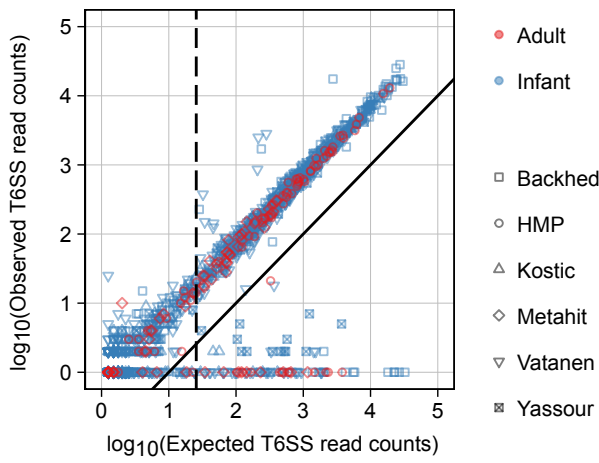

**B**

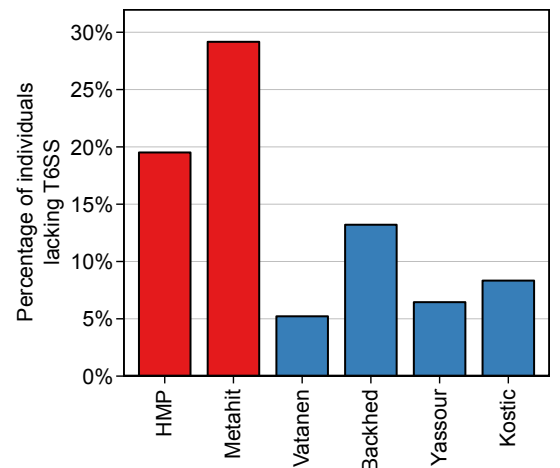

**C**

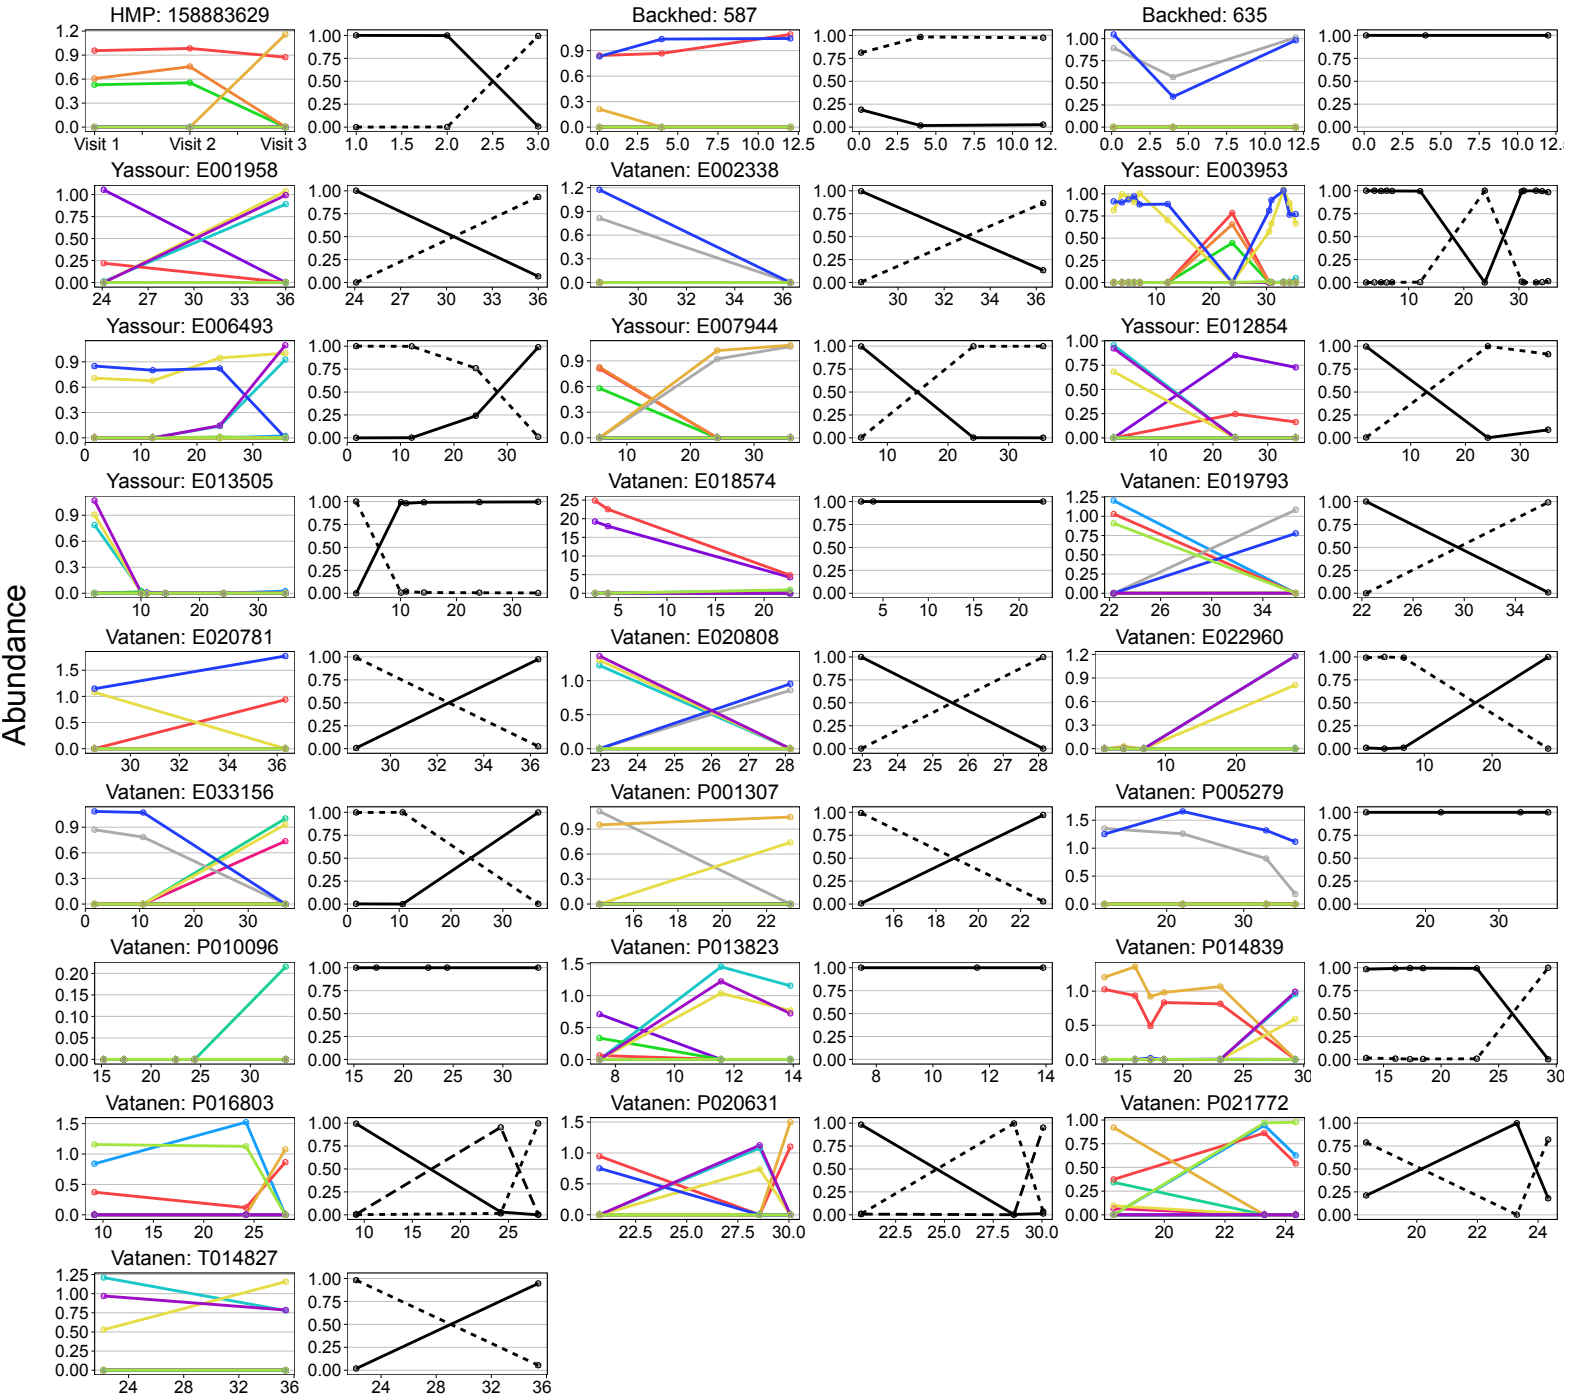

**D**

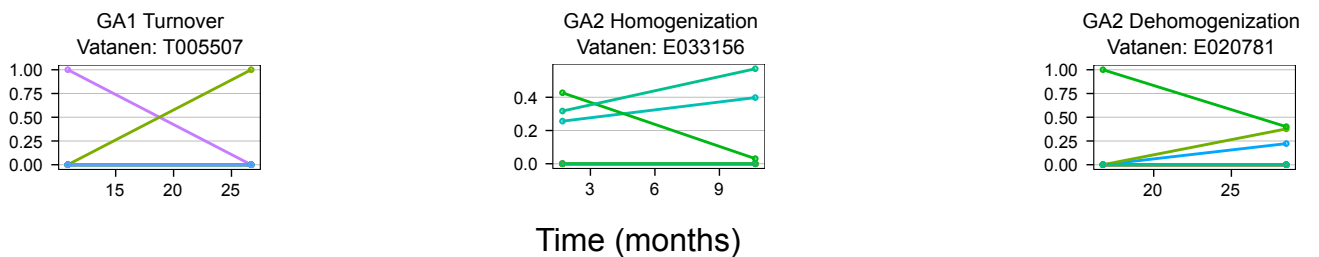

**Figure S4. The prevalence of T6SS- samples and patterns of E-I turnover. Related to Figure 3.**

**(A)** The prevalence of T6SS- samples in infants and adults as ascertained through the relationship between the number of reads expected and measured to map to the GA3 T6SS structural genes, from each adult (red) and infant (blue) gut microbiome sample. The expected number is based on the number of reads mapping to *B. fragilis*-specific marker genes, normalized by gene lengths. The dotted line represents the cutoff used for determining that *B. fragilis* is present in a sample. The solid line represents an observed number of reads that is 10% of expected, and was used to distinguish T6SS+ from T6SS- samples. As evident by this plot, T6SS+ and T6SS- samples can be clearly defined. Different shapes correspond to different datasets, with adult samples colored in red and infant samples in blue. **(B)** The percentage of individuals of those harboring *B. fragilis*, that lack the GA3 T6SS across different adult (red) and infant (blue) datasets. Individuals that were not consistent in terms of T6SS+/- classification across different time points were not included. **(C)** E-I turnover and strain replacement for GA3. Details and format are as in Figure 3C-E (top plots). Each pair of plots is labeled with the individual code and the dataset it comes from. **(D)** Analysis of GA1 and GA2 over time has demonstrated similar patterns to those observed for GA3, with most individuals exhibiting a conserved effector profile over time. Among the few individuals that exhibited different E-I profiles at different time points, we can observe examples of E-I turnover, E-I genotype homogenization (a decrease in diversity over time), and E-I genotype dehomogenization. Here the abundance on the y-axis refers to the relative abundance of GA1 or GA2 effector genes.

**Table S1. Genus-level differential abundance in T6SS+ vs. T6SS- samples. Related to Figure 4.**  
Abundances are based on a 16S rRNA survey and only genera which are sufficiently abundant across T6SS+ vs. T6SS- samples are listed.

| <i>Genus</i>                 | Median Abundance<br>T6SS+ (%) | Median Abundance<br>T6SS- (%) | p-value  | FDR Adjusted<br>p-value | Passes<br>FDR |
|------------------------------|-------------------------------|-------------------------------|----------|-------------------------|---------------|
| <i>Faecalibacterium</i>      | 3.8                           | 10.6                          | 8.30E-04 | 1.70E-02                | TRUE          |
| <i>Bacteroides</i>           | 57.9                          | 37.5                          | 3.10E-03 | 1.90E-02                | TRUE          |
| <i>Ruminococcus</i>          | 1.5                           | 3.5                           | 3.10E-03 | 1.90E-02                | TRUE          |
| <i>Oscillospira</i>          | 1.8                           | 3.5                           | 3.60E-03 | 1.90E-02                | TRUE          |
| <i>Eubacterium</i>           | 0.3                           | 0.4                           | 1.70E-02 | 7.20E-02                | FALSE         |
| <i>Odoribacter</i>           | 0.4                           | 0.8                           | 2.80E-02 | 9.80E-02                | FALSE         |
| <i>Subdoligranulum</i>       | 1.9                           | 3.3                           | 3.50E-02 | 1.10E-01                | FALSE         |
| <i>Sutterella</i>            | 2.4                           | 0.1                           | 7.60E-02 | 2.00E-01                | FALSE         |
| <i>Dialister</i>             | 1.2                           | 0.7                           | 1.10E-01 | 2.50E-01                | FALSE         |
| <i>Clostridium</i>           | 1.5                           | 0.9                           | 1.60E-01 | 3.20E-01                | FALSE         |
| <i>Alistipes</i>             | 5.7                           | 6.7                           | 1.80E-01 | 3.20E-01                | FALSE         |
| <i>Coprococcus</i>           | 0.5                           | 0.6                           | 1.80E-01 | 3.20E-01                | FALSE         |
| <i>Akkermansia</i>           | 0.1                           | 0.3                           | 2.20E-01 | 3.50E-01                | FALSE         |
| <i>Lachnospira</i>           | 0.7                           | 0.7                           | 2.60E-01 | 3.90E-01                | FALSE         |
| <i>Parabacteroides</i>       | 4.5                           | 2.1                           | 3.00E-01 | 4.20E-01                | FALSE         |
| <i>Roseburia</i>             | 1.5                           | 2.7                           | 4.50E-01 | 5.70E-01                | FALSE         |
| <i>Blautia</i>               | 0.9                           | 0.5                           | 4.60E-01 | 5.70E-01                | FALSE         |
| <i>Megamonas</i>             | 0.2                           | 0                             | 5.30E-01 | 6.20E-01                | FALSE         |
| <i>Prevotella</i>            | 0.1                           | 0.3                           | 6.00E-01 | 6.60E-01                | FALSE         |
| <i>Phascolarctobacterium</i> | 0.8                           | 0.8                           | 8.00E-01 | 8.40E-01                | FALSE         |
| <i>Escherichia</i>           | 0.1                           | 0.1                           | 8.50E-01 | 8.50E-01                | FALSE         |

**Table S2. E–I gene catalog and reference strains used. Related to STAR Methods.**

T6SS E–I accession numbers and locus tags are listed by genetic architecture subtype.

Reference strains used the study are listed in a separate sheet.

| GA1        |                                                |                    |                    |            |                    |                    |
|------------|------------------------------------------------|--------------------|--------------------|------------|--------------------|--------------------|
| Effector # | Genome                                         | Effector locus tag | Effector accession | Immunity # | Immunity locus tag | Immunity accession |
| GA1_E1     | <i>Bacteroides cellulosilyticus</i> CL02T12C19 | HMPREF1062_03920   | WP_007857070.1     | GA1_I1     | HMPREF1062_03918   | WP_004323409.1     |
| GA1_E2     | <i>Parabacteroides</i> sp. D25                 | HMPREF0999_RS10520 | WP_008669247.1     | GA1_I2     | HMPREF0999_RS10515 | WP_008669248.1     |
| GA1_E3     | <i>Bacteroides coprophilus</i> DSM 18228       | BACCOPRO_01421     | WP_008141979.1     | GA1_I3     | BACCOPRO_01420     | WP_008141977.1     |
| GA1_E4     | <i>Bacteroides fragilis</i> YCH46              | BF2847             | YP_100131.1        | GA1_I4     | BF2849             | YP_100132.1        |
| GA1_E5     | <i>Bacteroides fragilis</i> YCH46              | BF2850             | YP_100133.1        | GA1_I5     | BF2851             | YP_100134.1        |
| GA1_E6     | <i>Bacteroides fragilis</i> YCH46              | BF2852             | YP_100135.1        | GA1_I6     | BF2853             | YP_100136.1        |
| GA1_E7     | <i>Bacteroides</i> sp. 3_2_5                   | BSHG_RS0220345     | WP_007857070.1     | GA1_I7     | BSHG_4301          | WP_008659502.1     |
| GA1_E8     | <i>Bacteroides uniformis</i> CL03T00C23        | HMPREF1072_RS17450 | WP_005836806.1     | GA1_I8     | HMPREF1072_RS17445 | WP_005836803.1     |
| GA1_E9     | <i>Bacteroides vulgatus</i> 3775 SL(B) 10 (iv) | M097_RS18140       | WP_011203027.1     | GA1_I9     | M097_RS18145       | WP_008776200.1     |
| GA2        |                                                |                    |                    |            |                    |                    |
| Effector # | Genome                                         | Effector locus tag | Effector accession | Immunity # | Immunity locus tag | Immunity accession |
| GA2_E1     | <i>Parabacteroides distasonis</i> CL03T12C09   | HMPREF1075_RS12295 | WP_036629059.1     | GA2_I1     | HMPREF1075_RS12300 | WP_005858631.1     |
| GA2_E2     | <i>Bacteroides fragilis</i> CL05T00C42         | HMPREF1079_RS08215 | WP_005802593.1     | GA2_I2     | HMPREF1079_RS08220 | WP_005802592.1     |
| GA2_E3     | <i>Bacteroides eggerthi</i> DSM 20697          | BACEGG_RS01920     | WP_004288712.1     | GA2_I3     | BACEGG_RS01915     | WP_039953011.1     |
| GA2_E4     | <i>Bacteroides caccae</i> CL03T12C61           | HMPREF1061_RS00705 | WP_005682920.1     | GA2_I4     | HMPREF1061_RS00700 | WP_005682921.1     |
| GA2_E5     | <i>Bacteroides caccae</i> CL03T12C61           | HMPREF1061_RS00780 | WP_005682903.1     | GA2_I5     | HMPREF1061_RS00775 | WP_005682904.1     |
| GA2_E6     | <i>Bacteroides vulgatus</i> dnLKV7             | C800_RS02355       | WP_016271567.1     | GA2_I6     | C800_RS02360       | WP_016271566.1     |
| GA2_E7     | <i>Bacteroides vulgatus</i> dnLKV7             | C800_RS02310       | WP_016271575.1     | GA2_I7     | C800_RS02305       | WP_016271576.1     |
| GA2_E8     | <i>Bacteroides dorei</i> DSM17855              | BACDOR_RS16910     | WP_007832792.1     | GA2_I8     | BACDOR_RS16905     | WP_007832794.1     |
| GA2_E9     | <i>Parabacteroides</i> sp. 20_3                | HMPREF9008_RS04985 | WP_007832792.1     | GA2_I9     | HMPREF9008_RS04990 | WP_005858575.1     |
| GA2_E10    | <i>Parabacteroides</i> sp. 20_3                | HMPREF9008_RS04905 | WP_008778001.1     | GA2_I10    | HMPREF9008_RS04900 | WP_008778000.1     |
| GA2_E11    | <i>Parabacteroides</i> sp. 20_3                | HMPREF9008_RS23040 | WP_008778764.1     | GA2_I11    | HMPREF9008_RS23045 | WP_005942723.1     |
| GA2_E12    | <i>Parabacteroides</i> sp. 20_3                | HMPREF9008_RS22995 | WP_005942780.1     | GA2_I12    | HMPREF9008_RS22990 | WP_005942781.1     |
| GA2_E13    | <i>Bacteroides vulgatus</i> dnLKV7             | C800_RS02240       | WP_016271588.1     | GA2_I13    | C800_RS02360       | WP_016271589.1     |
| GA2_E14    | <i>Bacteroides dorei</i> DSM17855              | BACDOR_RS22955     | WP_007832756.1     | GA2_I14    | BACDOR_RS17020     | WP_032935744.1     |
| GA2_E15    | <i>Parabacteroides distasonis</i> CL03T12C09   | HMPREF1075_RS12175 | WP_007832792.1     | GA2_I15    | HMPREF1075_RS12170 | WP_005858587.1     |
| GA2_E16    | <i>Bacteroides caccae</i> CL03T12C61           | HMPREF1061_RS00825 | WP_005682893.1     | GA2_I16    | HMPREF1061_RS00830 | WP_005054721.1     |
| GA2_E17    | <i>Bacteroides dorei</i> DSM17855              | BACDOR_RS16955     | WP_007832774.1     | GA2_I17    | BACDOR_RS16960     | WP_032935753.1     |
| GA2_E18    | <i>Bacteroides fragilis</i> CL05T00C42         | HMPREF1079_RS08170 | WP_005802603.1     | GA2_I18    | HMPREF1079_RS08165 | WP_005802605.1     |
| GA3        |                                                |                    |                    |            |                    |                    |
| Effector # | Genome                                         | Effector locus tag | Effector accession | Immunity # | Immunity locus tag | Immunity accession |
| GA3_E1     | <i>Bacteroides fragilis</i> 3774_T13           | M117_RS11205       | WP_008659774.1     | GA3_I1     | M117_RS0122600     | WP_008659772.1     |
| GA3_E2     | <i>Bacteroides fragilis</i> 3774_T13           | M117_RS11240       | WP_008659750.1     | GA3_I2     | M117_RS11245       | WP_008659758.1     |
| GA3_E3     | <i>Bacteroides fragilis</i> 3774_T13           | M117_RS23385       | WP_050444646.1     | GA3_I3     | M117_RS11255       | WP_008659747.1     |
| GA3_E4     | <i>Bacteroides fragilis</i> DS-166             | M074_RS10745       | WP_025814153.1     | GA3_I4     | M074_RS10750       | WP_025814152.1     |
| GA3_E5     | <i>Bacteroides fragilis</i> DS-166             | M074_RS10800       | WP_011202656.1     | GA3_I5     | M074_RS10805       | WP_011202655.1     |
| GA3_E6     | <i>Bacteroides fragilis</i> NCTC 9343          | BF9343_1937        | WP_010992803.1     | GA3_I6     | BF9343_1936        | WP_005787090.1     |
| GA3_E7     | <i>Bacteroides fragilis</i> NCTC 9343          | BF9343_1928        | WP_010992798.1     | GA3_I7     | BF9343_1927        | WP_010992797.1     |
| GA3_E8     | <i>Bacteroides fragilis</i> J38-1              | M068_RS11120       | WP_032561265.1     | GA3_I8     | M068_2000          | WP_005787075.1     |
| GA3_E9     | <i>Bacteroides fragilis</i> Korea_419          | M065_RS13210       | WP_032600880.1     | GA3_I9     | M065_2764          | WP_005794673.1     |
| GA3_E10    | <i>Bacteroides fragilis</i> Korea_419          | M065_RS13185       | WP_005794682.1     | GA3_I10    | M065_2759          | WP_005794684.1     |
| GA3_E11    | <i>Bacteroides fragilis</i> B1_(UDC16-1)       | M069_RS16890       | WP_009292151.1     | GA3_I11    | M069_2106          | WP_009292150.1     |
| GA3_E12    | <i>Bacteroides fragilis</i> B1_(UDC16-1)       | M069_RS31145       | WP_050446922.1     | GA3_I12    | M069_2103          | WP_032571500.1     |
| GA3_E13    | <i>Bacteroides fragilis</i> DS-71              | M073_RS11420       | WP_032589942.1     | GA3_I13    | M073_1832          | WP_032562840.1     |
| GA3_E14    | <i>Bacteroides fragilis</i> HMW616             | HMPREF1205_RS15360 | WP_005819888.1     | GA3_I14    | HMPREF1205_03575   | WP_005819890.1     |

| Genome                       | Strain             | Assembly        | GenBank FTP                                                                    |
|------------------------------|--------------------|-----------------|--------------------------------------------------------------------------------|
| Bacteroides cellulosilyticus | WH2                | GCA_001318345.1 | ftp://ftp.ncbi.nlm.nih.gov/genomes/all/GCA_001318345.1_ASM131834v1             |
| Bacteroides cellulosilyticus | DSM 14838          | GCA_000158035.1 | ftp://ftp.ncbi.nlm.nih.gov/genomes/all/GCA_000158035.1_ASM15803v1              |
| Bacteroides cellulosilyticus | CL02T12C19         | GCA_000273015.1 | ftp://ftp.ncbi.nlm.nih.gov/genomes/all/GCA_000273015.1_Bact_cell_CL02T12C19_V1 |
| Bacteroides cellulosilyticus | WH2                | GCA_000463315.1 | ftp://ftp.ncbi.nlm.nih.gov/genomes/all/GCA_000463315.1_B_cell_WH2_1.0          |
| Bacteroides cellulosilyticus | CL09T06C25         | GCA_001535595.1 | ftp://ftp.ncbi.nlm.nih.gov/genomes/all/GCA_001535595.1_ASM153559v1             |
| Bacteroides dorei            | DSM 17855          | GCA_000156075.1 | ftp://ftp.ncbi.nlm.nih.gov/genomes/all/GCA_000156075.1_ASM15607v1              |
| Bacteroides dorei            | 5_1_36/D4          | GCA_000158335.2 | ftp://ftp.ncbi.nlm.nih.gov/genomes/all/GCA_000158335.2_Bact_dorei_5_1_36_D4_V2 |
| Bacteroides dorei            | CL02T00C15         | GCA_000273035.1 | ftp://ftp.ncbi.nlm.nih.gov/genomes/all/GCA_000273035.1_Bact_dore_CL02T00C15_V1 |
| Bacteroides dorei            | CL02T12C06         | GCA_000273055.1 | ftp://ftp.ncbi.nlm.nih.gov/genomes/all/GCA_000273055.1_Bact_dore_CL02T12C06_V1 |
| Bacteroides dorei            | CL03T12C01         | GCA_000273075.1 | ftp://ftp.ncbi.nlm.nih.gov/genomes/all/GCA_000273075.1_Bact_dore_CL03T12C01_V1 |
| Bacteroides dorei            |                    | GCA_000738045.1 | ftp://ftp.ncbi.nlm.nih.gov/genomes/all/GCA_000738045.1_ASM73804v1              |
| Bacteroides dorei            |                    | GCA_000738065.1 | ftp://ftp.ncbi.nlm.nih.gov/genomes/all/GCA_000738065.1_ASM73806v1              |
| Bacteroides dorei            |                    | GCA_001274835.1 | ftp://ftp.ncbi.nlm.nih.gov/genomes/all/GCA_001274835.1_ASM127483v1             |
| Bacteroides ovatus           | ATCC 8483          | GCA_001314995.1 | ftp://ftp.ncbi.nlm.nih.gov/genomes/all/GCA_001314995.1_ASM131499v1             |
| Bacteroides ovatus           | ATCC 8483          | GCA_000154125.1 | ftp://ftp.ncbi.nlm.nih.gov/genomes/all/GCA_000154125.1_ASM15412v1              |
| Bacteroides ovatus           | 3_8_47FAA          | GCA_000218325.1 | ftp://ftp.ncbi.nlm.nih.gov/genomes/all/GCA_000218325.1_Bact_ovat_3_8_47FAA_V1  |
| Bacteroides ovatus           | CL02T12C04         | GCA_000273195.1 | ftp://ftp.ncbi.nlm.nih.gov/genomes/all/GCA_000273195.1_Bact_ovat_CL02T12C04_V1 |
| Bacteroides ovatus           | CL03T12C18         | GCA_000273215.1 | ftp://ftp.ncbi.nlm.nih.gov/genomes/all/GCA_000273215.1_Bact_ovat_CL03T12C18_V1 |
| Bacteroides ovatus           | KLE1656            | GCA_001578575.1 | ftp://ftp.ncbi.nlm.nih.gov/genomes/all/GCA_001578575.1_ASM157857v1             |
| Bacteroides ovatus           | SD CMC 3f          | GCA_000178275.1 | ftp://ftp.ncbi.nlm.nih.gov/genomes/all/GCA_000178275.1_ASM17827v1              |
| Bacteroides ovatus           | 3725 D9 iii        | GCA_000699665.1 | ftp://ftp.ncbi.nlm.nih.gov/genomes/all/GCA_000699665.1_ASM69966v1              |
| Bacteroides ovatus           | 3725 D1 iv         | GCA_000699725.1 | ftp://ftp.ncbi.nlm.nih.gov/genomes/all/GCA_000699725.1_ASM69972v1              |
| Bacteroides ovatus           | CL09T03C03         | GCA_001535615.1 | ftp://ftp.ncbi.nlm.nih.gov/genomes/all/GCA_001535615.1_ASM153561v1             |
| Bacteroides thetaiotaomicron | VPI-5482           | GCA_000011065.1 | ftp://ftp.ncbi.nlm.nih.gov/genomes/all/GCA_000011065.1_ASM1106v1               |
| Bacteroides thetaiotaomicron | 7330               | GCA_001314975.1 | ftp://ftp.ncbi.nlm.nih.gov/genomes/all/GCA_001314975.1_ASM131497v1             |
| Bacteroides thetaiotaomicron | dnLKV9             | GCA_000403155.2 | ftp://ftp.ncbi.nlm.nih.gov/genomes/all/GCA_000403155.2_Bact_thet_dnLKV9_V1     |
| Bacteroides thetaiotaomicron | KLE1254            | GCA_001578565.1 | ftp://ftp.ncbi.nlm.nih.gov/genomes/all/GCA_001578565.1_ASM157856v1             |
| Bacteroides thetaiotaomicron | 2e6A               | GCA_001373135.1 | ftp://ftp.ncbi.nlm.nih.gov/genomes/all/GCA_001373135.1_2e6A_assembly           |
| Bacteroides thetaiotaomicron | 19_BTHE            | GCA_001055755.1 | ftp://ftp.ncbi.nlm.nih.gov/genomes/all/GCA_001055755.1_ASM105575v1             |
| Bacteroides thetaiotaomicron | 3a5B               | GCA_000937835.1 | ftp://ftp.ncbi.nlm.nih.gov/genomes/all/GCA_000937835.1_3a5B_assembly           |
| Bacteroides thetaiotaomicron |                    | GCA_001049535.1 | ftp://ftp.ncbi.nlm.nih.gov/genomes/all/GCA_001049535.1_3731                    |
| Bacteroides thetaiotaomicron |                    | GCA_001049555.1 | ftp://ftp.ncbi.nlm.nih.gov/genomes/all/GCA_001049555.1_7330                    |
| Bacteroides uniformis        | CL03T00C23         | GCA_000273785.1 | ftp://ftp.ncbi.nlm.nih.gov/genomes/all/GCA_000273785.1_Bact_unif_CL03T00C23_V1 |
| Bacteroides uniformis        | ATCC 8492          | GCA_000154205.1 | ftp://ftp.ncbi.nlm.nih.gov/genomes/all/GCA_000154205.1_ASM15420v1              |
| Bacteroides uniformis        | CL03T12C37         | GCA_000273275.1 | ftp://ftp.ncbi.nlm.nih.gov/genomes/all/GCA_000273275.1_Bact_unif_CL03T12C37_V1 |
| Bacteroides uniformis        | dnLKV2             | GCA_000403175.2 | ftp://ftp.ncbi.nlm.nih.gov/genomes/all/GCA_000403175.2_Bact_unif_dnLKV2_V1     |
| Bacteroides uniformis        | KLE1607            | GCA_001578555.1 | ftp://ftp.ncbi.nlm.nih.gov/genomes/all/GCA_001578555.1_ASM157855v1             |
| Bacteroides uniformis        | 3978 T3 ii         | GCA_000699825.1 | ftp://ftp.ncbi.nlm.nih.gov/genomes/all/GCA_000699825.1_ASM69982v1              |
| Bacteroides uniformis        | 3978 T3 i          | GCA_000699885.1 | ftp://ftp.ncbi.nlm.nih.gov/genomes/all/GCA_000699885.1_ASM69988v1              |
| Bacteroides uniformis        | 2a7B               | GCA_000939155.1 | ftp://ftp.ncbi.nlm.nih.gov/genomes/all/GCA_000939155.1_2a7B_assembly3          |
| Bacteroides uniformis        | 2a3A               | GCA_001403955.1 | ftp://ftp.ncbi.nlm.nih.gov/genomes/all/GCA_001403955.1_2a7B_assembly2          |
| Bacteroides vulgatus         | ATCC 8482          | GCA_000012825.1 | ftp://ftp.ncbi.nlm.nih.gov/genomes/all/GCA_000012825.1_ASM1282v1               |
| Bacteroides vulgatus         | mpk                | GCA_001412315.1 | ftp://ftp.ncbi.nlm.nih.gov/genomes/all/GCA_001412315.1_ASM141231v1             |
| Bacteroides vulgatus         | CL09T03C04         | GCA_000273295.1 | ftp://ftp.ncbi.nlm.nih.gov/genomes/all/GCA_000273295.1_Bact_vulg_CL09T03C04_V1 |
| Bacteroides vulgatus         | dnLKV7             | GCA_000403235.2 | ftp://ftp.ncbi.nlm.nih.gov/genomes/all/GCA_000403235.2_Bact_vulg_dnLKV7_V1     |
| Bacteroides vulgatus         | PC510              | GCA_000178195.1 | ftp://ftp.ncbi.nlm.nih.gov/genomes/all/GCA_000178195.1_ASM17819v1              |
| Bacteroides vulgatus         | 3775 SL(B) 10 (iv) | GCA_000699705.1 | ftp://ftp.ncbi.nlm.nih.gov/genomes/all/GCA_000699705.1_ASM69970v1              |
| Bacteroides vulgatus         | 3775 SR(B) 19      | GCA_000699845.1 | ftp://ftp.ncbi.nlm.nih.gov/genomes/all/GCA_000699845.1_ASM69984v1              |
| Bacteroides vulgatus         | 3975 RP4           | GCA_000699865.1 | ftp://ftp.ncbi.nlm.nih.gov/genomes/all/GCA_000699865.1_ASM69986v1              |
| Bacteroides xylanisolvens    | CL03T12C04         | GCA_000273315.1 | ftp://ftp.ncbi.nlm.nih.gov/genomes/all/GCA_000273315.1_Bact_xyla_CL03T12C04_V1 |
| Bacteroides xylanisolvens    | SD CC 1b           | GCA_000178215.1 | ftp://ftp.ncbi.nlm.nih.gov/genomes/all/GCA_000178215.1_ASM17821v1              |
| Bacteroides xylanisolvens    | SD CC 2a           | GCA_000178295.1 | ftp://ftp.ncbi.nlm.nih.gov/genomes/all/GCA_000178295.1_ASM17829v1              |
| Bacteroides xylanisolvens    |                    | GCA_000577295.1 | ftp://ftp.ncbi.nlm.nih.gov/genomes/all/GCA_000577295.1_SD_CC_1b                |
| Bacteroides xylanisolvens    |                    | GCA_000577955.1 | ftp://ftp.ncbi.nlm.nih.gov/genomes/all/GCA_000577955.1_SD_CC_2a                |
| Bacteroides xylanisolvens    | XB1A               | GCA_000210075.1 | ftp://ftp.ncbi.nlm.nih.gov/genomes/all/GCA_000210075.1_ASM21007v1              |
| Bacteroides fragilis         | YCH46              | GCA_00009925.1  | ftp://ftp.ncbi.nlm.nih.gov/genomes/all/GCA_00009925.1_ASM992v1                 |
| Bacteroides fragilis         | 638R               | GCA_000210835.1 | ftp://ftp.ncbi.nlm.nih.gov/genomes/all/GCA_000210835.1_ASM21083v1              |
| Bacteroides fragilis         | BOB25              | GCA_000965785.1 | ftp://ftp.ncbi.nlm.nih.gov/genomes/all/GCA_000965785.1_ASM96578v1              |
| Bacteroides fragilis         | BE1                | GCA_001286525.1 | ftp://ftp.ncbi.nlm.nih.gov/genomes/all/GCA_001286525.1_BFBE1.1                 |
| Bacteroides fragilis         | CL07T00C01         | GCA_000263115.1 | ftp://ftp.ncbi.nlm.nih.gov/genomes/all/GCA_000263115.1_Bact_frag_CL07T00C01_V1 |
| Bacteroides fragilis         | CL03T00C08         | GCA_000273095.1 | ftp://ftp.ncbi.nlm.nih.gov/genomes/all/GCA_000273095.1_Bact_frag_CL03T00C08_V1 |
| Bacteroides fragilis         | CL03T12C07         | GCA_000273115.1 | ftp://ftp.ncbi.nlm.nih.gov/genomes/all/GCA_000273115.1_Bact_frag_CL03T12C07_V1 |
| Bacteroides fragilis         | CL05T12C13         | GCA_000273135.1 | ftp://ftp.ncbi.nlm.nih.gov/genomes/all/GCA_000273135.1_Bact_frag_CL05T12C13_V1 |
| Bacteroides fragilis         | CL07T12C05         | GCA_000273155.1 | ftp://ftp.ncbi.nlm.nih.gov/genomes/all/GCA_000273155.1_Bact_frag_CL07T12C05_V1 |
| Bacteroides fragilis         | CL05T00C42         | GCA_000273765.1 | ftp://ftp.ncbi.nlm.nih.gov/genomes/all/GCA_000273765.1_Bact_frag_CL05T00C42_V1 |
| Bacteroides fragilis         | HMW 615            | GCA_000297735.1 | ftp://ftp.ncbi.nlm.nih.gov/genomes/all/GCA_000297735.1_Bact_frag_HMW_615_V1    |
| Bacteroides fragilis         | DCMOUH0042B        | GCA_000724795.1 | ftp://ftp.ncbi.nlm.nih.gov/genomes/all/GCA_000724795.1_DCMOUH0042B1.0          |
| Bacteroides fragilis         | 2-F-2 #7           | GCA_000598145.1 | ftp://ftp.ncbi.nlm.nih.gov/genomes/all/GCA_000598145.1_ASM59814v1              |



|                      |              |                 |                                                                   |
|----------------------|--------------|-----------------|-------------------------------------------------------------------|
| Bacteroides fragilis | 3976T7       | GCA_000598165.1 | ftp://ftp.ncbi.nlm.nih.gov/genomes/all/GCA_000598165.1_ASM59816v1 |
| Bacteroides fragilis | 3986T(B)10   | GCA_000598185.2 | ftp://ftp.ncbi.nlm.nih.gov/genomes/all/GCA_000598185.2_ASM59818v2 |
| Bacteroides fragilis | 3988 T1      | GCA_000598205.1 | ftp://ftp.ncbi.nlm.nih.gov/genomes/all/GCA_000598205.1_ASM59820v1 |
| Bacteroides fragilis | 3996 N(B) 6  | GCA_000598225.1 | ftp://ftp.ncbi.nlm.nih.gov/genomes/all/GCA_000598225.1_ASM59822v1 |
| Bacteroides fragilis | DS-166       | GCA_000598245.1 | ftp://ftp.ncbi.nlm.nih.gov/genomes/all/GCA_000598245.1_ASM59824v1 |
| Bacteroides fragilis | 1007-1-F #8  | GCA_000598265.1 | ftp://ftp.ncbi.nlm.nih.gov/genomes/all/GCA_000598265.1_ASM59826v1 |
| Bacteroides fragilis | 2-F-2 #5     | GCA_000598285.1 | ftp://ftp.ncbi.nlm.nih.gov/genomes/all/GCA_000598285.1_ASM59828v1 |
| Bacteroides fragilis | 3774 T13     | GCA_000598305.1 | ftp://ftp.ncbi.nlm.nih.gov/genomes/all/GCA_000598305.1_ASM59830v1 |
| Bacteroides fragilis | 3783N1-2     | GCA_000598325.1 | ftp://ftp.ncbi.nlm.nih.gov/genomes/all/GCA_000598325.1_ASM59832v1 |
| Bacteroides fragilis | 3783N2-1     | GCA_000598345.1 | ftp://ftp.ncbi.nlm.nih.gov/genomes/all/GCA_000598345.1_ASM59834v1 |
| Bacteroides fragilis | 3988T(B)14   | GCA_000598365.1 | ftp://ftp.ncbi.nlm.nih.gov/genomes/all/GCA_000598365.1_ASM59836v1 |
| Bacteroides fragilis | 3998 T(B) 4  | GCA_000598385.1 | ftp://ftp.ncbi.nlm.nih.gov/genomes/all/GCA_000598385.1_ASM59838v1 |
| Bacteroides fragilis | 34-F-2 #13   | GCA_000598425.1 | ftp://ftp.ncbi.nlm.nih.gov/genomes/all/GCA_000598425.1_ASM59842v1 |
| Bacteroides fragilis | 3986 N(B)19  | GCA_000598445.1 | ftp://ftp.ncbi.nlm.nih.gov/genomes/all/GCA_000598445.1_ASM59844v1 |
| Bacteroides fragilis | 3986 T(B)9   | GCA_000598465.1 | ftp://ftp.ncbi.nlm.nih.gov/genomes/all/GCA_000598465.1_ASM59846v1 |
| Bacteroides fragilis | 3998T(B)3    | GCA_000598485.1 | ftp://ftp.ncbi.nlm.nih.gov/genomes/all/GCA_000598485.1_ASM59848v1 |
| Bacteroides fragilis | DS-208       | GCA_000598505.1 | ftp://ftp.ncbi.nlm.nih.gov/genomes/all/GCA_000598505.1_ASM59850v1 |
| Bacteroides fragilis | J-143-4      | GCA_000598525.1 | ftp://ftp.ncbi.nlm.nih.gov/genomes/all/GCA_000598525.1_ASM59852v1 |
| Bacteroides fragilis | 1007-1-F #4  | GCA_000598545.2 | ftp://ftp.ncbi.nlm.nih.gov/genomes/all/GCA_000598545.2_ASM59854v2 |
| Bacteroides fragilis | 3397 N2      | GCA_000598565.1 | ftp://ftp.ncbi.nlm.nih.gov/genomes/all/GCA_000598565.1_ASM59856v1 |
| Bacteroides fragilis | 3725 D9(v)   | GCA_000598585.1 | ftp://ftp.ncbi.nlm.nih.gov/genomes/all/GCA_000598585.1_ASM59858v1 |
| Bacteroides fragilis | 3783N1-8     | GCA_000598605.1 | ftp://ftp.ncbi.nlm.nih.gov/genomes/all/GCA_000598605.1_ASM59860v1 |
| Bacteroides fragilis | B1 (UDC16-1) | GCA_000598625.1 | ftp://ftp.ncbi.nlm.nih.gov/genomes/all/GCA_000598625.1_ASM59862v1 |
| Bacteroides fragilis | J38-1        | GCA_000598645.1 | ftp://ftp.ncbi.nlm.nih.gov/genomes/all/GCA_000598645.1_ASM59864v1 |
| Bacteroides fragilis | S23 R14      | GCA_000598665.1 | ftp://ftp.ncbi.nlm.nih.gov/genomes/all/GCA_000598665.1_ASM59866v1 |
| Bacteroides fragilis | 1007-1-F #10 | GCA_000598685.2 | ftp://ftp.ncbi.nlm.nih.gov/genomes/all/GCA_000598685.2_ASM59868v2 |
| Bacteroides fragilis | 1009-4-F #10 | GCA_000598705.1 | ftp://ftp.ncbi.nlm.nih.gov/genomes/all/GCA_000598705.1_ASM59870v1 |
| Bacteroides fragilis | 3719 T6      | GCA_000598725.1 | ftp://ftp.ncbi.nlm.nih.gov/genomes/all/GCA_000598725.1_ASM59872v1 |
| Bacteroides fragilis | S24L26       | GCA_000598745.1 | ftp://ftp.ncbi.nlm.nih.gov/genomes/all/GCA_000598745.1_ASM59874v1 |
| Bacteroides fragilis | S38L3        | GCA_000598765.2 | ftp://ftp.ncbi.nlm.nih.gov/genomes/all/GCA_000598765.2_ASM59876v2 |
| Bacteroides fragilis | I1345        | GCA_000598785.2 | ftp://ftp.ncbi.nlm.nih.gov/genomes/all/GCA_000598785.2_ASM59878v2 |
| Bacteroides fragilis | Ds-233       | GCA_000598805.1 | ftp://ftp.ncbi.nlm.nih.gov/genomes/all/GCA_000598805.1_ASM59880v1 |
| Bacteroides fragilis | 2-F-2 #4     | GCA_000598825.1 | ftp://ftp.ncbi.nlm.nih.gov/genomes/all/GCA_000598825.1_ASM59882v1 |
| Bacteroides fragilis | 3719 A10     | GCA_000598845.1 | ftp://ftp.ncbi.nlm.nih.gov/genomes/all/GCA_000598845.1_ASM59884v1 |
| Bacteroides fragilis | 3-F-2 #6     | GCA_000598865.1 | ftp://ftp.ncbi.nlm.nih.gov/genomes/all/GCA_000598865.1_ASM59886v1 |
| Bacteroides fragilis | 1007-1-F #9  | GCA_000598885.1 | ftp://ftp.ncbi.nlm.nih.gov/genomes/all/GCA_000598885.1_ASM59888v1 |
| Bacteroides fragilis | 20793-3      | GCA_000598905.1 | ftp://ftp.ncbi.nlm.nih.gov/genomes/all/GCA_000598905.1_ASM59890v1 |
| Bacteroides fragilis | 3397 N3      | GCA_000598925.1 | ftp://ftp.ncbi.nlm.nih.gov/genomes/all/GCA_000598925.1_ASM59892v1 |
| Bacteroides fragilis | 3986 N(B)22  | GCA_000598945.1 | ftp://ftp.ncbi.nlm.nih.gov/genomes/all/GCA_000598945.1_ASM59894v1 |
| Bacteroides fragilis | 3986 T(B)13  | GCA_000598965.1 | ftp://ftp.ncbi.nlm.nih.gov/genomes/all/GCA_000598965.1_ASM59896v1 |
| Bacteroides fragilis | A7 (UDC12-2) | GCA_000598985.1 | ftp://ftp.ncbi.nlm.nih.gov/genomes/all/GCA_000598985.1_ASM59898v1 |
| Bacteroides fragilis | S24L15       | GCA_000599005.1 | ftp://ftp.ncbi.nlm.nih.gov/genomes/all/GCA_000599005.1_ASM59900v1 |
| Bacteroides fragilis | S36L5        | GCA_000599025.1 | ftp://ftp.ncbi.nlm.nih.gov/genomes/all/GCA_000599025.1_ASM59902v1 |
| Bacteroides fragilis | S6R5         | GCA_000599045.1 | ftp://ftp.ncbi.nlm.nih.gov/genomes/all/GCA_000599045.1_ASM59904v1 |
| Bacteroides fragilis | 3783N1-6     | GCA_000599065.2 | ftp://ftp.ncbi.nlm.nih.gov/genomes/all/GCA_000599065.2_ASM59906v2 |
| Bacteroides fragilis | DS-71        | GCA_000599085.1 | ftp://ftp.ncbi.nlm.nih.gov/genomes/all/GCA_000599085.1_ASM59908v1 |
| Bacteroides fragilis | S13 L11      | GCA_000599105.1 | ftp://ftp.ncbi.nlm.nih.gov/genomes/all/GCA_000599105.1_ASM59910v1 |
| Bacteroides fragilis | S36L11       | GCA_000599125.1 | ftp://ftp.ncbi.nlm.nih.gov/genomes/all/GCA_000599125.1_ASM59912v1 |
| Bacteroides fragilis | 1007-1-F #7  | GCA_000599145.2 | ftp://ftp.ncbi.nlm.nih.gov/genomes/all/GCA_000599145.2_ASM59914v2 |
| Bacteroides fragilis | 3397 T14     | GCA_000599165.2 | ftp://ftp.ncbi.nlm.nih.gov/genomes/all/GCA_000599165.2_ASM59916v2 |
| Bacteroides fragilis | 3976T8       | GCA_000599185.2 | ftp://ftp.ncbi.nlm.nih.gov/genomes/all/GCA_000599185.2_ASM59918v2 |
| Bacteroides fragilis | Korea 419    | GCA_000599205.1 | ftp://ftp.ncbi.nlm.nih.gov/genomes/all/GCA_000599205.1_ASM59920v1 |
| Bacteroides fragilis | S6L3         | GCA_000599225.1 | ftp://ftp.ncbi.nlm.nih.gov/genomes/all/GCA_000599225.1_ASM59922v1 |
| Bacteroides fragilis | S6R6         | GCA_000599245.1 | ftp://ftp.ncbi.nlm.nih.gov/genomes/all/GCA_000599245.1_ASM59924v1 |
| Bacteroides fragilis | 1007-1-F #3  | GCA_000599265.1 | ftp://ftp.ncbi.nlm.nih.gov/genomes/all/GCA_000599265.1_ASM59926v1 |
| Bacteroides fragilis | 1009-4-F #7  | GCA_000599285.2 | ftp://ftp.ncbi.nlm.nih.gov/genomes/all/GCA_000599285.2_ASM59928v2 |
| Bacteroides fragilis | S23L24       | GCA_000599305.1 | ftp://ftp.ncbi.nlm.nih.gov/genomes/all/GCA_000599305.1_ASM59930v1 |
| Bacteroides fragilis | S24L34       | GCA_000599325.1 | ftp://ftp.ncbi.nlm.nih.gov/genomes/all/GCA_000599325.1_ASM59932v1 |
| Bacteroides fragilis | S36L12       | GCA_000599345.1 | ftp://ftp.ncbi.nlm.nih.gov/genomes/all/GCA_000599345.1_ASM59934v1 |
| Bacteroides fragilis | S38L5        | GCA_000599365.1 | ftp://ftp.ncbi.nlm.nih.gov/genomes/all/GCA_000599365.1_ASM59936v1 |
| Bacteroides fragilis | S6L8         | GCA_000599385.1 | ftp://ftp.ncbi.nlm.nih.gov/genomes/all/GCA_000599385.1_ASM59938v1 |
| Bacteroides fragilis | 1007-1-F #5  | GCA_000601035.1 | ftp://ftp.ncbi.nlm.nih.gov/genomes/all/GCA_000601035.1_ASM60103v1 |
| Bacteroides fragilis | S23L17       | GCA_000601055.1 | ftp://ftp.ncbi.nlm.nih.gov/genomes/all/GCA_000601055.1_ASM60105v1 |
| Bacteroides fragilis | S6R8         | GCA_000601075.2 | ftp://ftp.ncbi.nlm.nih.gov/genomes/all/GCA_000601075.2_ASM60107v2 |
| Bacteroides fragilis | 1007-1-F #6  | GCA_000601095.1 | ftp://ftp.ncbi.nlm.nih.gov/genomes/all/GCA_000601095.1_ASM60109v1 |
| Bacteroides fragilis | 3986 N3      | GCA_000601115.1 | ftp://ftp.ncbi.nlm.nih.gov/genomes/all/GCA_000601115.1_ASM60111v1 |
